# Supplementary material
Source: PubMed Central journal article supplement (PMC4128694)
Supplement: NIHMS603768-supplement-Supplemental_Data.pdf [file NIHMS603768-supplement-Supplemental_Data.pdf]

## Appendix.

$^{18}\text{F}$ -FDG PET-MR images: atMR slice (A), MR attenuation map (B), fused atMR-MR attenuation map (C) and fused atMR-PET image (D)

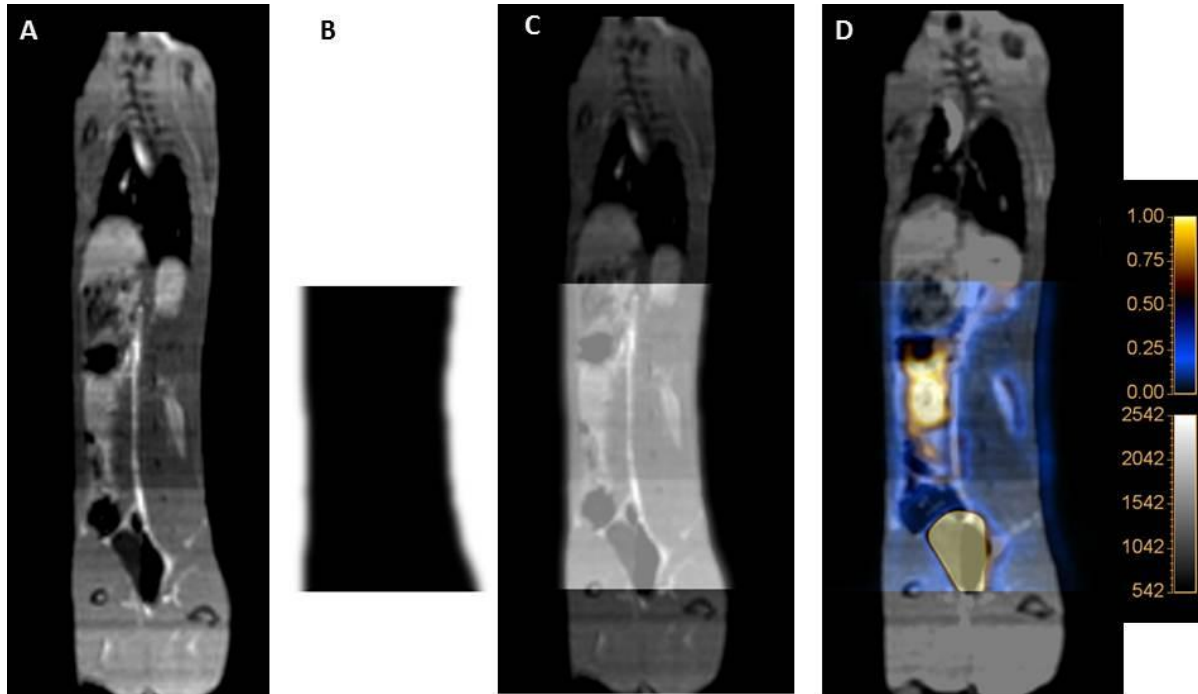

The segmentation algorithm to produce the MR attenuation map, in the case of animal imaging, consists of a two-segment classification between air and soft tissue. This method provides a body contour segmentation image of the animal with the interior of the animal assigned a pre-determined soft-tissue attenuation coefficient value ( $0.095\text{ cm}^{-1}$ ) and air attenuation coefficient value ( $0\text{ cm}^{-1}$ ).
